# Supplementary material for: Ultrastructure of the liver microcirculation influences hepatic and systemic insulin activity and provides a mechanism for age‐related insulin resistance
Source: PubMed Central journal article supplement (PMC4933657; doi:10.1111/acel.12481), 2016-04-20

**S1 H&E Staining of liver tissue from the young and old rats and control and P07 treated rats.**  
There was no evidence of liver pathology in any of the animal groups (Scale bar = 1 micron)

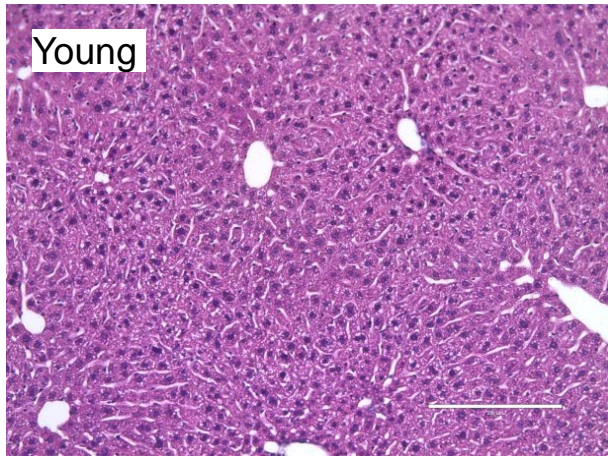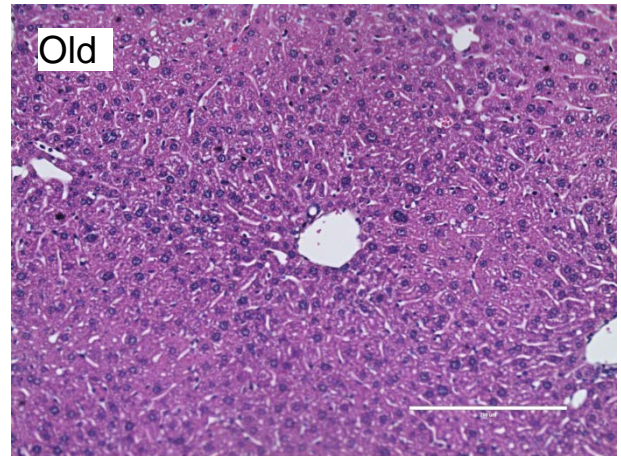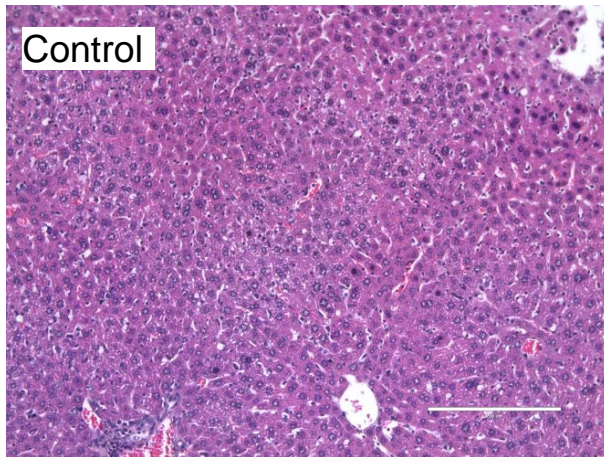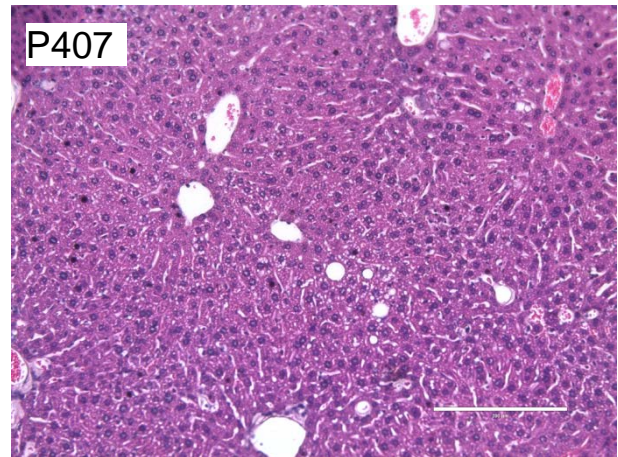

**S2 Multiple Indicator Dilution experiments in middle aged F344 rats.** There was an intermediate loss of insulin transfer in the middle aged rats.

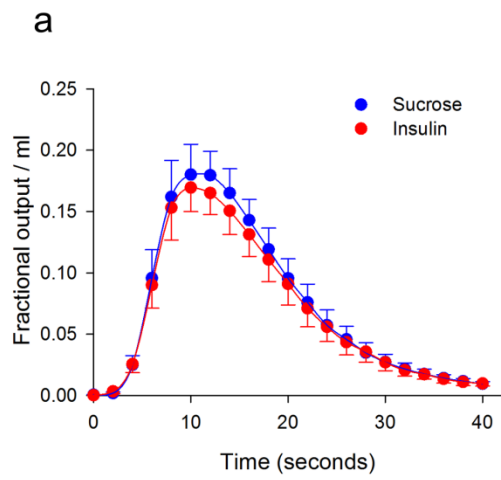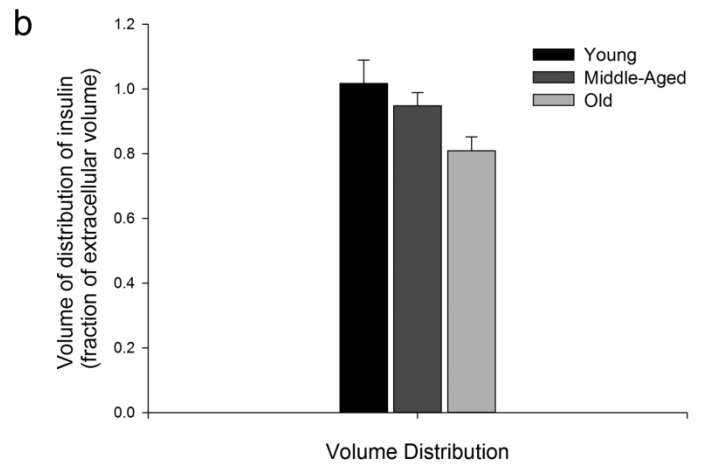

### S3 Supplementary information for Phosphoproteomics

Quantitative phosphoproteomics of 47 peptides containing insulin-regulated sites from the KEGG insulin signaling pathway. Z-scores of  $>+/-1.0$  were considered significant. Log<sub>2</sub> values are provided to show statistical variation.

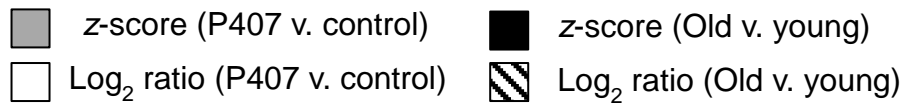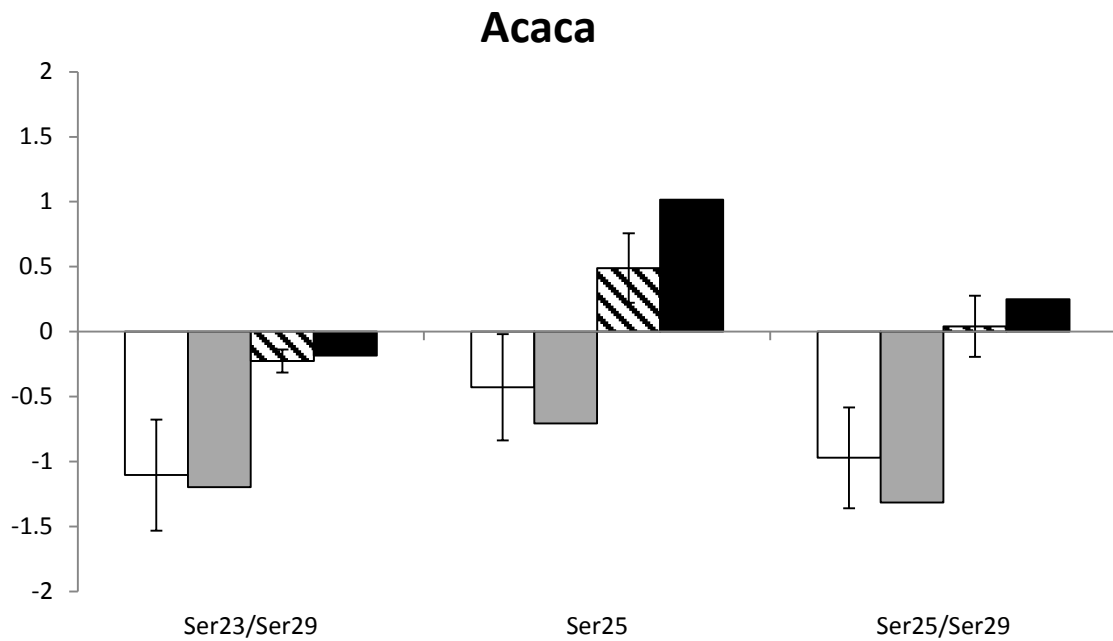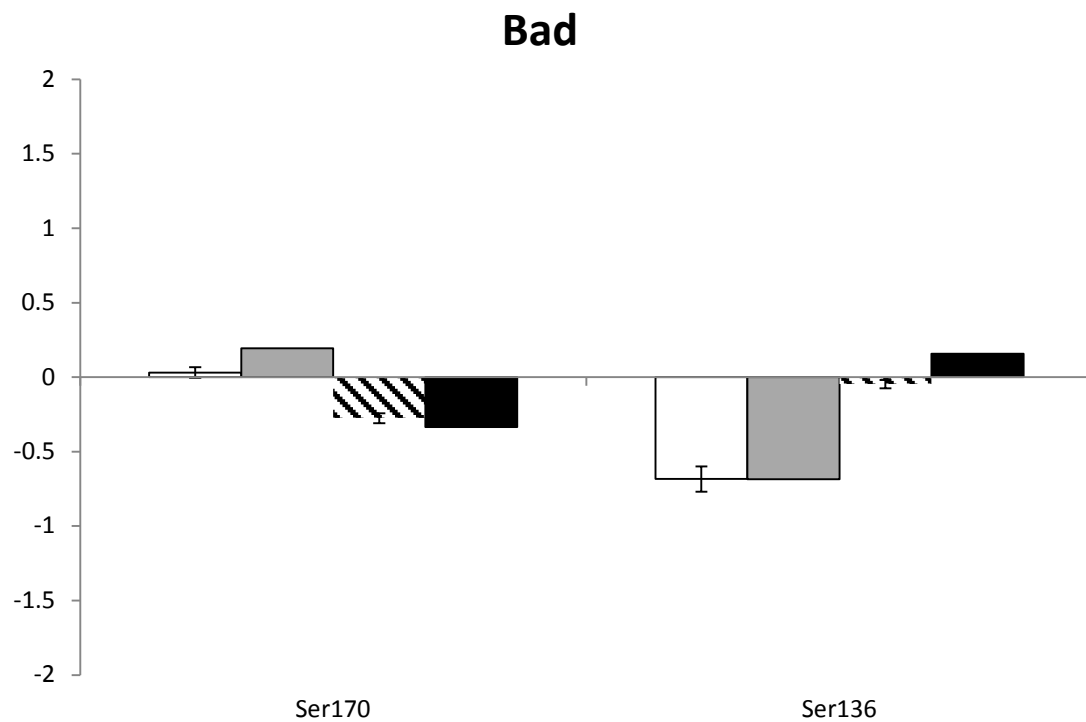

### Akt1

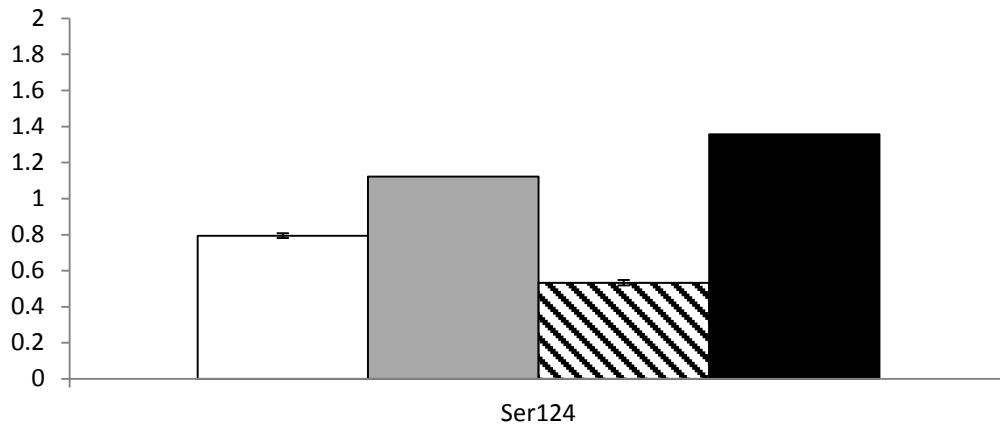

### Eif4ebp1

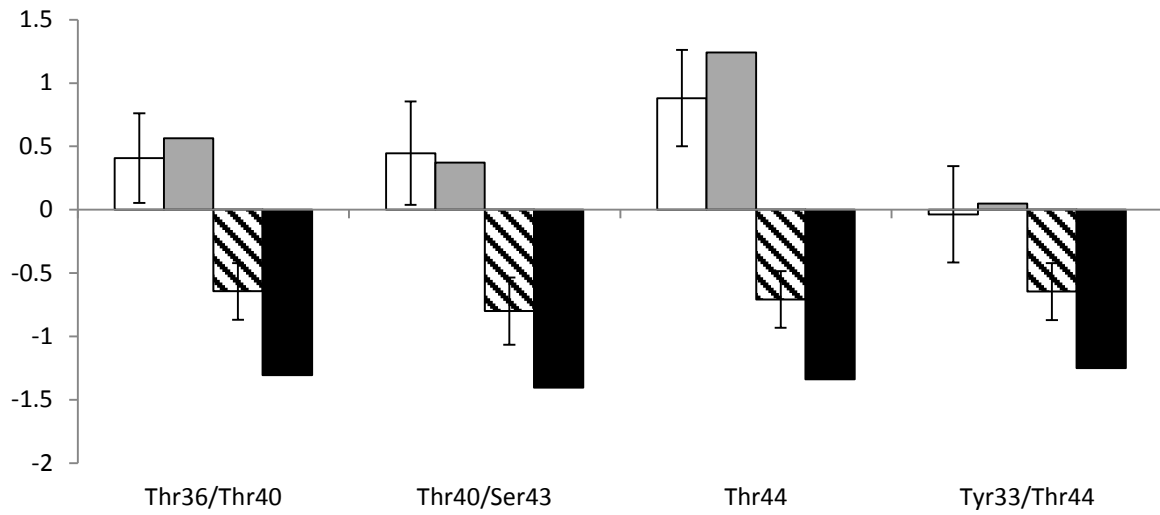

### Foxo1

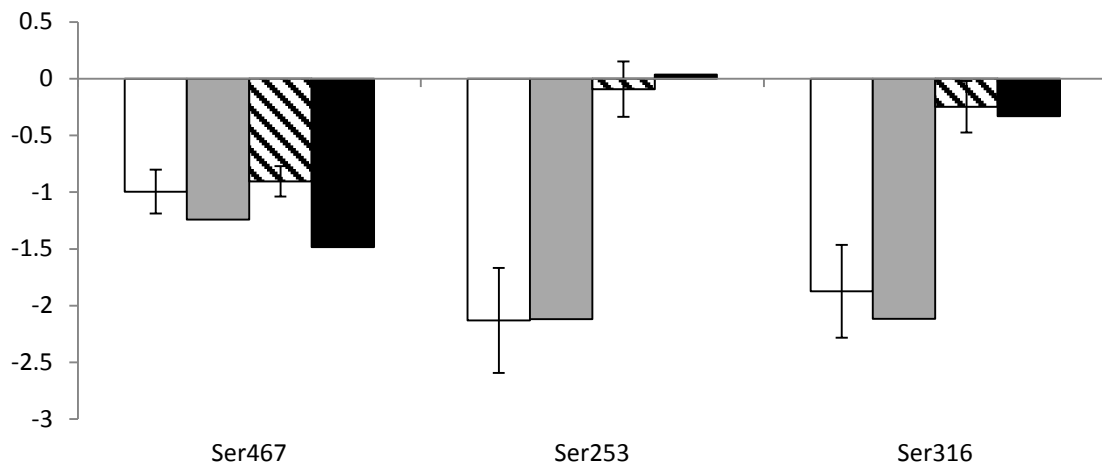

## Gys1

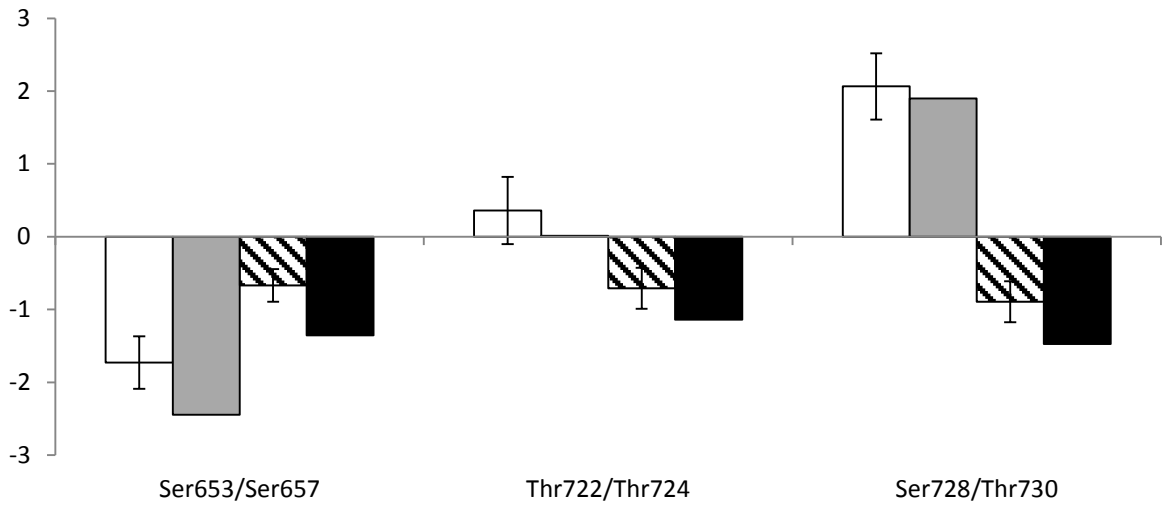

## Mapk1

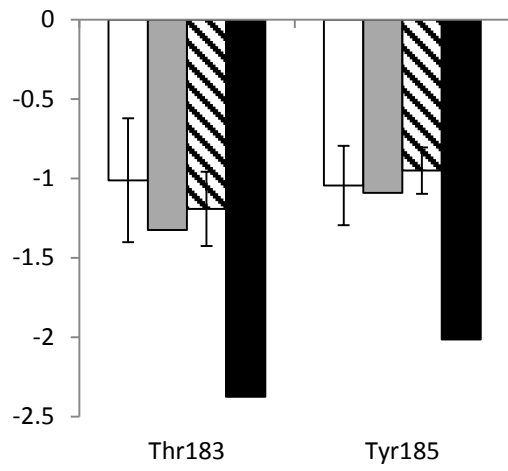

## Mapk3

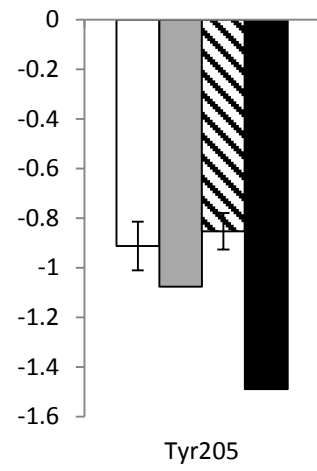

## Pik3r6

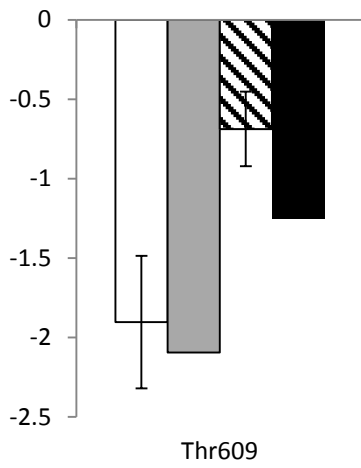

## Pik3c2a

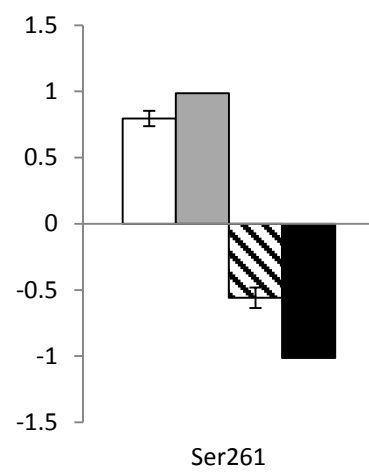

# Irs1

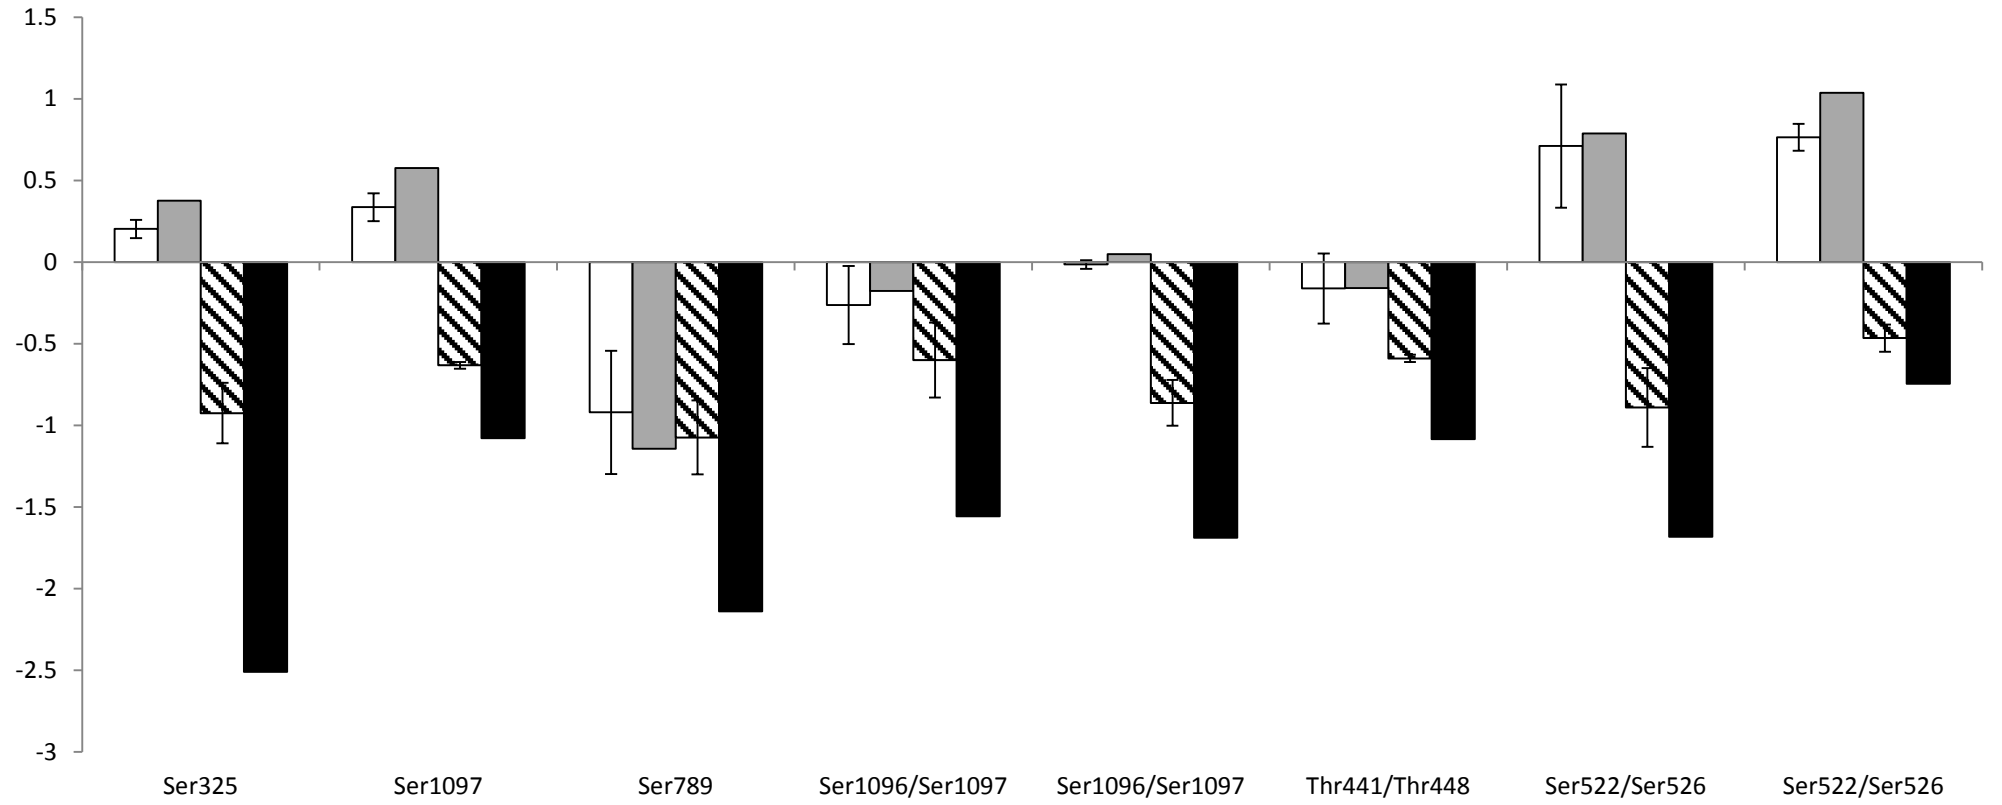

## Irs2

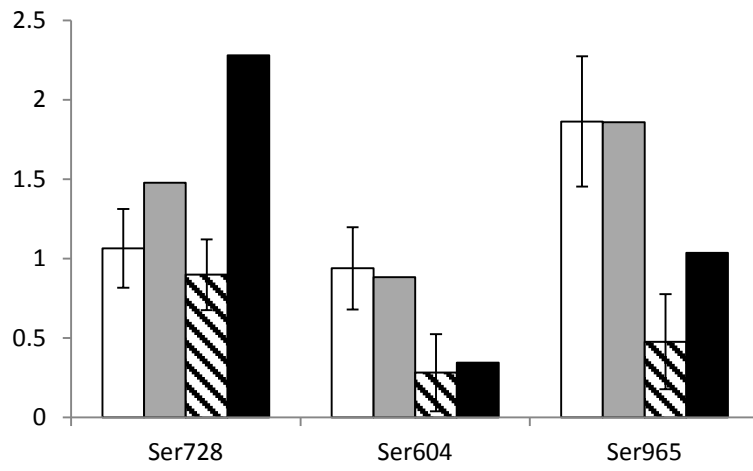

## Raf1

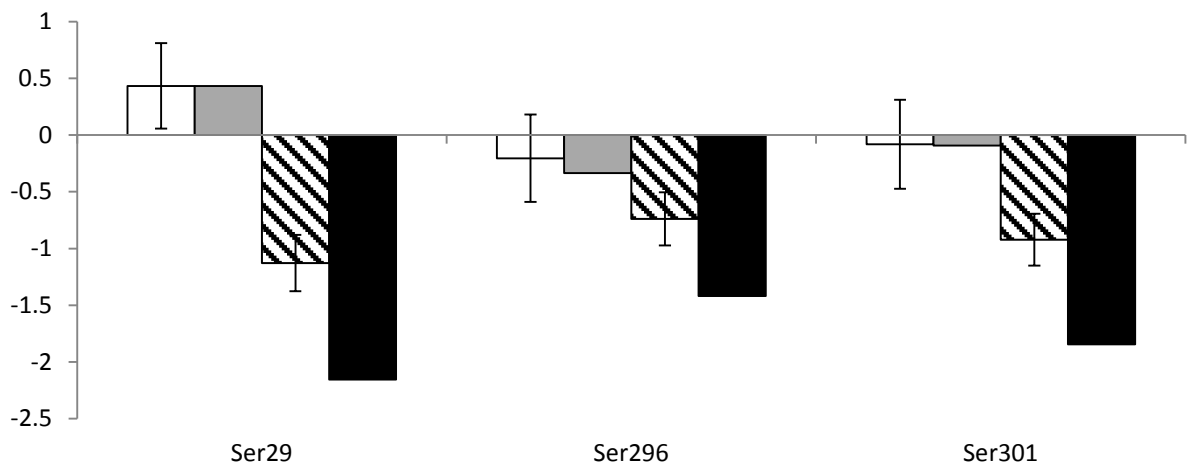

## Rps6

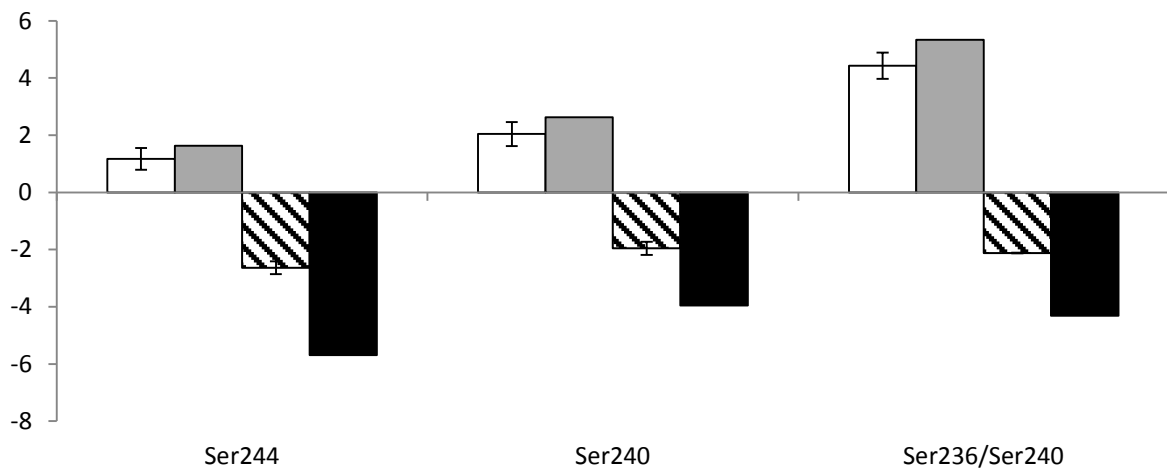

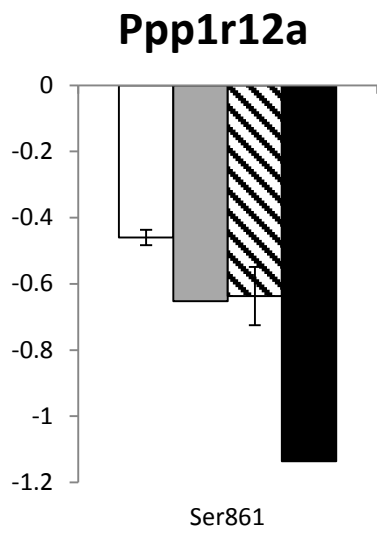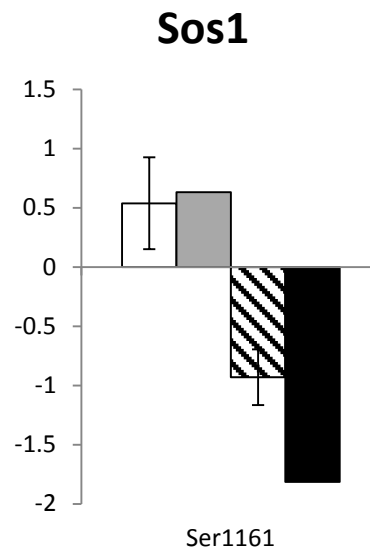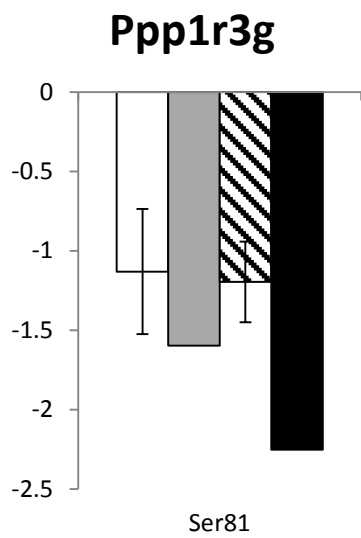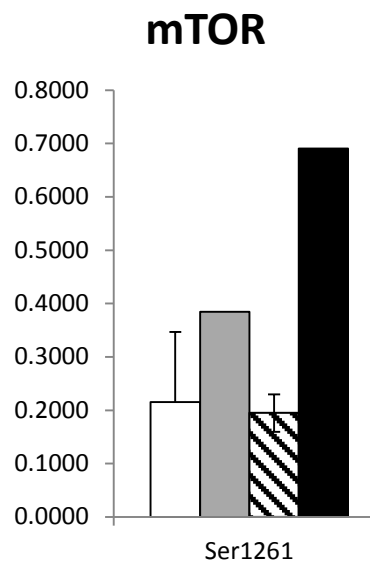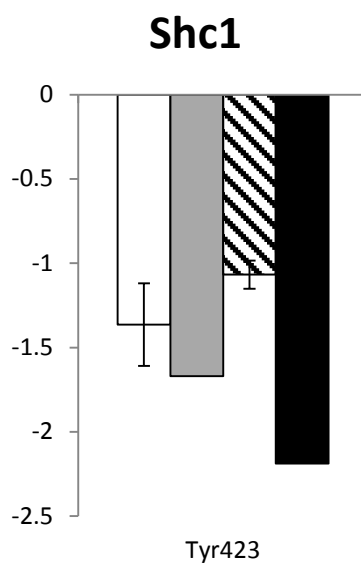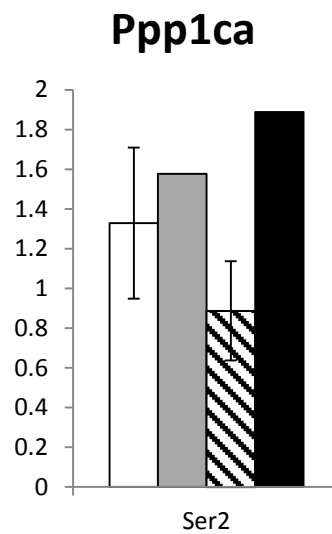



### Trip10

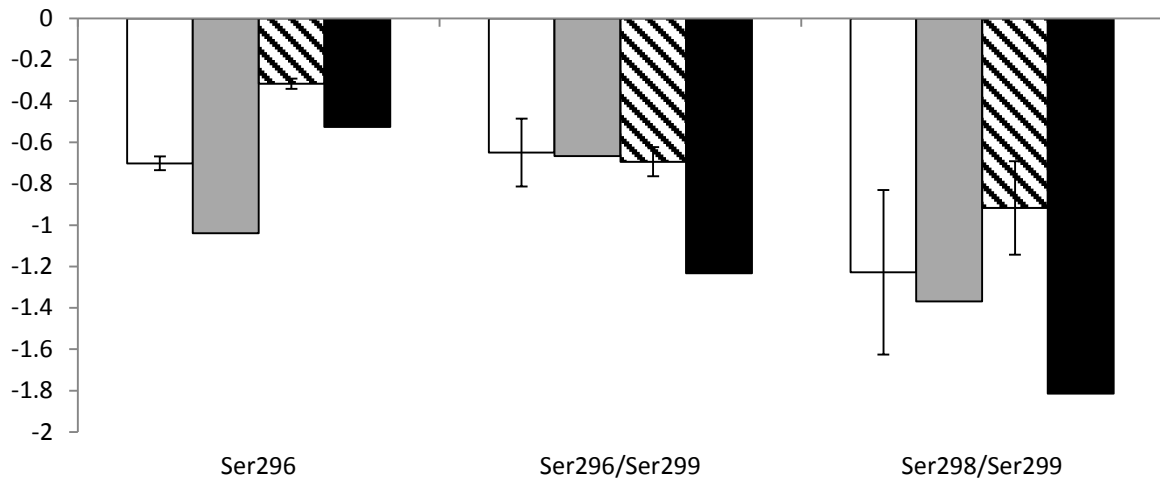

### Rps6kb1

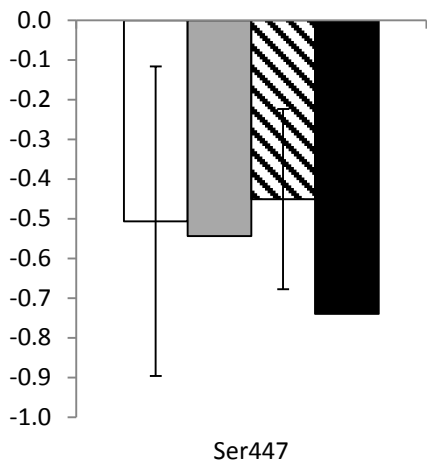

### Tsc2

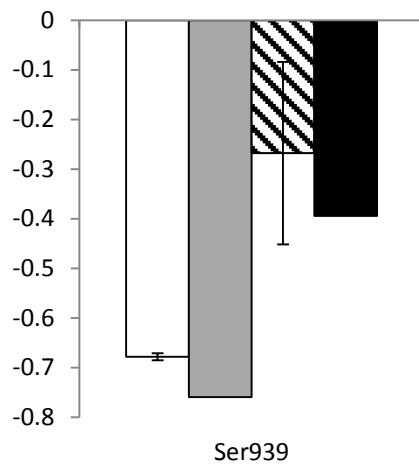

#### S4- RTPCR data for Insulin signalling pathway in Young versus Old livers and Control versus P407 livers

**Legend:**

**Fold-Change** ( $2^{-(\Delta\Delta Ct)}$ ) is the normalized gene expression ( $2^{-(\Delta Ct)}$ ) in the Test Sample divided the normalized gene expression ( $2^{-(\Delta Ct)}$ ) in the Control Sample.

**Fold-Regulation** represents fold-change results in a biologically meaningful way. Fold-change values greater than one indicate a positive- or an up-regulation, and the fold-regulation is equal to the fold-change

Fold-change values less than one indicate a negative or down-regulation, and the fold-regulation is the negative inverse of the fold-change.

Fold-change and fold-regulation values greater than 2 are indicated in red; fold-change values less than 0.5 and fold-regulation values less than -2 are indicated in blue.

**p-values:** The p values are calculated based on a Student's t-test of the replicate  $2^{-(\Delta Ct)}$  values for each gene in the control group and treatment groups, and p values less than 0.05 are indicated in red.

**Comments:**

A: This gene's average threshold cycle is relatively high (> 30) in either the control or the test sample, and is reasonably low in the other sample (< 30).

These data mean that the gene's expression is relatively low in one sample and reasonably detected in the other sample suggesting that the actual fold-change value is at least as large as the calculated and reported fold-change result.

This fold-change result may also have greater variations if p value > 0.05; therefore, it is important to have a sufficient number of biological replicates to validate the result for this gene.

B: This gene's average threshold cycle is relatively high (> 30), meaning that its relative expression level is low, in both control and test samples, and the p-value for the fold-change is either unavailable or relatively high ( $p > 0.05$ ).

This fold-change result may also have greater variations; therefore, it is important to have a sufficient number of biological replicates to validate the result for this gene.

C: This gene's average threshold cycle is either not determined or greater than the defined cut-off (default 35), in both samples meaning that its expression was undetected, making this fold-change result erroneous and un-interpretable.

| Symbol   | Well | AVG $\Delta C_t$<br>(Ct(GOI) - Ave Ct<br>(HKG)) |       | $2^{-\Delta C_t}$ |         | Fold<br>Change | T-TEST          | Fold Up-<br>or Down-<br>Regulation |
|----------|------|-------------------------------------------------|-------|-------------------|---------|----------------|-----------------|------------------------------------|
|          |      | OLD                                             | YOUNG | OLD               | YOUNG   | OLD<br>/YOUNG  | p value         | OLD<br>/YOUNG                      |
| Acaca    | A01  | 3.11                                            | 2.33  | 1.2E-01           | 2.0E-01 | 0.58           | 0.294059        | -1.71                              |
| Acox1    | A02  | 5.05                                            | 6.38  | 3.0E-02           | 1.2E-02 | 2.52           | 0.965517        | 2.52                               |
| Adra1d   | A03  | 9.45                                            | 10.32 | 1.4E-03           | 7.8E-04 | 1.83           | 0.342633        | 1.83                               |
| Aebp1    | A04  | 7.88                                            | 6.60  | 4.2E-03           | 1.0E-02 | 0.41           | 0.402924        | -2.42                              |
| Akt1     | A05  | 4.15                                            | 4.00  | 5.6E-02           | 6.3E-02 | 0.90           | 0.814608        | -1.11                              |
| Akt2     | A06  | 6.83                                            | 8.03  | 8.8E-03           | 3.8E-03 | 2.30           | 0.863440        | 2.30                               |
| Akt3     | A07  | 7.14                                            | 7.38  | 7.1E-03           | 6.0E-03 | 1.18           | 0.600176        | 1.18                               |
| Araf     | A08  | 2.64                                            | 2.74  | 1.6E-01           | 1.5E-01 | 1.08           | 0.685440        | 1.08                               |
| Bcl2l1   | A09  | 6.30                                            | 5.66  | 1.3E-02           | 2.0E-02 | 0.64           | 0.511245        | -1.55                              |
| Braf     | A10  | 5.00                                            | 5.19  | 3.1E-02           | 2.7E-02 | 1.14           | 0.961619        | 1.14                               |
| Cap1     | A11  | 2.44                                            | 3.16  | 1.8E-01           | 1.1E-01 | 1.65           | 0.322493        | 1.65                               |
| Cbl      | A12  | 7.53                                            | 7.76  | 5.4E-03           | 4.6E-03 | 1.17           | 0.952396        | 1.17                               |
| Cebpa    | B01  | 2.33                                            | 2.18  | 2.0E-01           | 2.2E-01 | 0.91           | 0.732909        | -1.10                              |
| Cebpb    | B02  | 6.27                                            | 7.75  | 1.3E-02           | 4.6E-03 | 2.80           | 0.996637        | 2.80                               |
| Cfd      | B03  | 7.67                                            | 8.33  | 4.9E-03           | 3.1E-03 | 1.58           | 0.539415        | 1.58                               |
| Dok1     | B04  | 9.19                                            | 10.19 | 1.7E-03           | 8.5E-04 | 2.01           | 0.341850        | 2.01                               |
| Dok2     | B05  | 9.17                                            | 9.79  | 1.7E-03           | 1.1E-03 | 1.53           | 0.394094        | 1.53                               |
| Dok3     | B06  | 9.31                                            | 9.86  | 1.6E-03           | 1.1E-03 | 1.46           | 0.421388        | 1.46                               |
| Dusp14   | B07  | 8.27                                            | 7.45  | 3.2E-03           | 5.7E-03 | 0.57           | 0.780596        | -1.76                              |
| Eif2b1   | B08  | 4.71                                            | 4.08  | 3.8E-02           | 5.9E-02 | 0.64           | 0.272332        | -1.55                              |
| Eif4ebp1 | B09  | 1.85                                            | 1.24  | 2.8E-01           | 4.2E-01 | 0.66           | 0.306678        | -1.53                              |
| Ercc1    | B10  | 7.74                                            | 9.01  | 4.7E-03           | 1.9E-03 | 2.42           | 0.801794        | 2.42                               |
| Fasn     | B11  | 3.80                                            | -0.91 | 7.2E-02           | 1.9E+00 | <b>0.04</b>    | <b>0.022161</b> | <b>-26.22</b>                      |
| Fbp1     | B12  | 8.02                                            | 8.14  | 3.9E-03           | 3.5E-03 | 1.09           | 0.859602        | 1.09                               |
| Fos      | C01  | 7.14                                            | 8.67  | 7.1E-03           | 2.5E-03 | 2.90           | 0.789263        | 2.90                               |
| Frs2     | C02  | 6.62                                            | 6.94  | 1.0E-02           | 8.1E-03 | 1.25           | 0.505022        | 1.25                               |
| Frs3     | C03  | 5.82                                            | 7.04  | 1.8E-02           | 7.6E-03 | 2.33           | 0.711226        | 2.33                               |
| G6pc     | C04  | 7.95                                            | 6.89  | 4.0E-03           | 8.4E-03 | 0.48           | 0.672318        | -2.08                              |
| Gab1     | C05  | 5.29                                            | 5.70  | 2.6E-02           | 1.9E-02 | 1.32           | 0.796305        | 1.32                               |
| Gcg      | C06  | 6.57                                            | 7.70  | 1.1E-02           | 4.8E-03 | 2.18           | 0.659937        | 2.18                               |
| Gck      | C07  | 6.22                                            | 6.58  | 1.3E-02           | 1.0E-02 | 1.28           | 0.789675        | 1.28                               |
| Gpd1     | C08  | 7.75                                            | 7.34  | 4.6E-03           | 6.2E-03 | 0.75           | 0.542770        | -1.33                              |
| Grb10    | C09  | 6.06                                            | 6.65  | 1.5E-02           | 1.0E-02 | 1.51           | 0.698559        | 1.51                               |
| Grb2     | C10  | 6.82                                            | 8.10  | 8.8E-03           | 3.7E-03 | 2.42           | 0.753414        | 2.42                               |
| Gsk3b    | C11  | 8.84                                            | 10.07 | 2.2E-03           | 9.3E-04 | 2.34           | 0.324282        | 2.34                               |
| Hk2      | C12  | 6.37                                            | 7.40  | 1.2E-02           | 5.9E-03 | 2.04           | 0.594500        | 2.04                               |
| Hras     | D01  | 5.97                                            | 6.82  | 1.6E-02           | 8.9E-03 | 1.80           | 0.448238        | 1.80                               |
| Igf1r    | D02  | 9.29                                            | 8.83  | 1.6E-03           | 2.2E-03 | 0.73           | 0.928575        | -1.37                              |

| Symbol   | Well | AVG $\Delta C_t$<br>(Ct(GOI) - Ave Ct<br>(HKG)) |       | $2^{-\Delta C_t}$ |         | Fold<br>Change | T-TEST   | Fold Up-<br>or Down-<br>Regulation |
|----------|------|-------------------------------------------------|-------|-------------------|---------|----------------|----------|------------------------------------|
|          |      | OLD                                             | YOUNG | OLD               | YOUNG   | OLD<br>/YOUNG  | p value  | OLD<br>/YOUNG                      |
| Igf2     | D03  | 4.72                                            | 6.40  | 3.8E-02           | 1.2E-02 | <b>3.21</b>    | 0.822011 | <b>3.21</b>                        |
| Igfbp1   | D04  | 9.45                                            | 9.57  | 1.4E-03           | 1.3E-03 | 1.09           | 0.477142 | 1.09                               |
| Ins1     | D05  | 9.45                                            | 10.32 | 1.4E-03           | 7.8E-04 | 1.83           | 0.342633 | 1.83                               |
| Ins2     | D06  | 7.44                                            | 9.41  | 5.8E-03           | 1.5E-03 | <b>3.93</b>    | 0.196303 | <b>3.93</b>                        |
| Ins3     | D07  | 6.61                                            | 8.45  | 1.0E-02           | 2.9E-03 | <b>3.60</b>    | 0.598694 | <b>3.60</b>                        |
| Insr     | D08  | 2.46                                            | 2.86  | 1.8E-01           | 1.4E-01 | 1.32           | 0.813029 | 1.32                               |
| Irs1     | D09  | 3.77                                            | 3.50  | 7.3E-02           | 8.9E-02 | 0.83           | 0.845756 | -1.21                              |
| Irs2     | D10  | 4.55                                            | 5.13  | 4.3E-02           | 2.8E-02 | 1.50           | 0.363243 | 1.50                               |
| Jun      | D11  | 3.66                                            | 2.75  | 7.9E-02           | 1.5E-01 | 0.53           | 0.247933 | -1.87                              |
| Klf10    | D12  | 7.21                                            | 6.06  | 6.7E-03           | 1.5E-02 | 0.45           | 0.531329 | -2.23                              |
| Kras     | E01  | 4.77                                            | 4.76  | 3.7E-02           | 3.7E-02 | 0.99           | 0.756316 | -1.01                              |
| Ldlr     | E02  | 6.48                                            | 7.70  | 1.1E-02           | 4.8E-03 | 2.33           | 0.728540 | 2.33                               |
| Lep      | E03  | 7.17                                            | 8.40  | 6.9E-03           | 3.0E-03 | 2.34           | 0.817543 | 2.34                               |
| Map2k1   | E04  | 3.11                                            | 3.09  | 1.2E-01           | 1.2E-01 | 0.99           | 0.728693 | -1.01                              |
| Mapk1    | E05  | 4.74                                            | 4.46  | 3.7E-02           | 4.6E-02 | 0.82           | 0.748205 | -1.22                              |
| Mtor     | E06  | 9.45                                            | 10.32 | 1.4E-03           | 7.8E-04 | 1.83           | 0.342633 | 1.83                               |
| Nos2     | E07  | 7.70                                            | 8.94  | 4.8E-03           | 2.0E-03 | 2.36           | 0.898031 | 2.36                               |
| Npy      | E08  | 7.33                                            | 8.50  | 6.2E-03           | 2.8E-03 | 2.26           | 0.880665 | 2.26                               |
| Pck2     | E09  | 6.22                                            | 5.92  | 1.3E-02           | 1.7E-02 | 0.81           | 0.712001 | -1.23                              |
| Pdpc1    | E10  | 4.94                                            | 4.86  | 3.3E-02           | 3.4E-02 | 0.94           | 0.950127 | -1.06                              |
| Pik3ca   | E11  | 6.87                                            | 8.17  | 8.5E-03           | 3.5E-03 | 2.47           | 0.846339 | 2.47                               |
| Pik3cb   | E12  | 8.86                                            | 10.32 | 2.1E-03           | 7.8E-04 | 2.74           | 0.296042 | 2.74                               |
| Pik3r1   | F01  | 3.18                                            | 3.15  | 1.1E-01           | 1.1E-01 | 0.98           | 0.692093 | -1.02                              |
| Pik3r2   | F02  | 5.97                                            | 5.30  | 1.6E-02           | 2.5E-02 | 0.63           | 0.464881 | -1.59                              |
| Pklr     | F03  | 6.24                                            | 4.80  | 1.3E-02           | 3.6E-02 | 0.37           | 0.464414 | -2.71                              |
| Pparg    | F04  | 9.45                                            | 9.94  | 1.4E-03           | 1.0E-03 | 1.41           | 0.404963 | 1.41                               |
| Ppp1ca   | F05  | 2.65                                            | 2.72  | 1.6E-01           | 1.5E-01 | 1.05           | 0.961231 | 1.05                               |
| Prkcg    | F06  | 7.51                                            | 8.98  | 5.5E-03           | 2.0E-03 | 2.78           | 0.660055 | 2.78                               |
| Prkcz    | F07  | 7.05                                            | 6.57  | 7.5E-03           | 1.0E-02 | 0.72           | 0.980219 | -1.39                              |
| Prl      | F08  | 7.20                                            | 8.70  | 6.8E-03           | 2.4E-03 | 2.82           | 0.811913 | 2.82                               |
| Ptpn1    | F09  | 6.93                                            | 8.58  | 8.2E-03           | 2.6E-03 | <b>3.14</b>    | 0.713847 | <b>3.14</b>                        |
| Raf1     | F10  | 1.89                                            | 2.55  | 2.7E-01           | 1.7E-01 | 1.58           | 0.363834 | 1.58                               |
| Retn     | F11  | 9.45                                            | 10.32 | 1.4E-03           | 7.8E-04 | 1.83           | 0.342633 | 1.83                               |
| Rps6ka1  | F12  | 7.87                                            | 9.15  | 4.3E-03           | 1.8E-03 | 2.43           | 0.661146 | 2.43                               |
| Rras     | G01  | 4.90                                            | 4.07  | 3.4E-02           | 6.0E-02 | 0.56           | 0.477690 | -1.78                              |
| Rras2    | G02  | 3.97                                            | 4.70  | 6.4E-02           | 3.9E-02 | 1.66           | 0.329842 | 1.66                               |
| Serpine1 | G03  | 5.59                                            | 5.51  | 2.1E-02           | 2.2E-02 | 0.94           | 0.806348 | -1.06                              |
| Shc1     | G04  | 5.09                                            | 5.11  | 2.9E-02           | 2.9E-02 | 1.01           | 0.729800 | 1.01                               |

| Symbol  | Well | AVG $\Delta C_t$<br>(Ct(GOI) - Ave Ct<br>(HKG)) |       | $2^{-\Delta C_t}$ |         | Fold<br>Change | T-TEST   | Fold Up-<br>or Down-<br>Regulation |
|---------|------|-------------------------------------------------|-------|-------------------|---------|----------------|----------|------------------------------------|
|         |      | OLD                                             | YOUNG | OLD               | YOUNG   | OLD<br>/YOUNG  | p value  | OLD<br>/YOUNG                      |
| Slc27a4 | G05  | 7.29                                            | 8.70  | 6.4E-03           | 2.4E-03 | 2.66           | 0.899783 | 2.66                               |
| Slc2a1  | G06  | 7.26                                            | 8.72  | 6.5E-03           | 2.4E-03 | 2.76           | 0.835286 | 2.76                               |
| Slc2a4  | G07  | 6.46                                            | 7.41  | 1.1E-02           | 5.9E-03 | 1.93           | 0.922519 | 1.93                               |
| Sos1    | G08  | 6.28                                            | 5.85  | 1.3E-02           | 1.7E-02 | 0.74           | 0.568297 | -1.34                              |
| Srebf1  | G09  | 1.82                                            | 1.09  | 2.8E-01           | 4.7E-01 | 0.60           | 0.291791 | -1.66                              |
| Tg      | G10  | 9.45                                            | 10.21 | 1.4E-03           | 8.4E-04 | 1.70           | 0.355179 | 1.70                               |
| Ucp1    | G11  | 9.26                                            | 10.32 | 1.6E-03           | 7.8E-04 | 2.08           | 0.333236 | 2.08                               |
| Vegfa   | G12  | 6.48                                            | 7.75  | 1.1E-02           | 4.6E-03 | 2.42           | 0.782530 | 2.42                               |
| Actb    | H01  | -1.03                                           | -1.43 | 2.0E+00           | 2.7E+00 | 0.76           | 0.658113 | -1.31                              |
| B2m     | H02  | 2.82                                            | 1.90  | 1.4E-01           | 2.7E-01 | 0.53           | 0.769787 | -1.89                              |
| Hprt1   | H03  | -0.84                                           | 0.20  | 1.8E+00           | 8.7E-01 | 2.06           | 0.922424 | 2.06                               |
| Ldha    | H04  | 0.42                                            | 0.03  | 7.5E-01           | 9.8E-01 | 0.77           | 0.809575 | -1.30                              |
| Rplp1   | H05  | -1.36                                           | -0.71 | 2.6E+00           | 1.6E+00 | 1.57           | 0.388136 | 1.57                               |

| Symbol   | Well | AVG $\Delta C_t$<br>(Ct(GOI) - Ave Ct<br>(HKG)) |         | $2^{-\Delta C_t}$ |         | Fold<br>Change   | T-TEST   | Fold Up-<br>or Down-<br>Regulation |
|----------|------|-------------------------------------------------|---------|-------------------|---------|------------------|----------|------------------------------------|
|          |      | P407                                            | CONTROL | P407              | CONTROL | P407<br>/CONTROL | p value  | P407<br>/CONTROL                   |
| Acaca    | A01  | 5.57                                            | 5.30    | 2.1E-02           | 2.5E-02 | 0.83             | 0.883138 | -1.20                              |
| Acox1    | A02  | 2.79                                            | 2.10    | 1.4E-01           | 2.3E-01 | 0.62             | N/A      | -1.62                              |
| Adra1d   | A03  | 14.67                                           | N/A     | 3.8E-05           | N/A     | N/A              | N/A      | N/A                                |
| Aebp1    | A04  | 10.31                                           | 10.92   | 7.9E-04           | 5.2E-04 | 1.53             | 0.168876 | 1.53                               |
| Akt1     | A05  | 5.86                                            | 6.12    | 1.7E-02           | 1.4E-02 | 1.20             | 0.555182 | 1.20                               |
| Akt2     | A06  | 5.04                                            | 5.27    | 3.0E-02           | 2.6E-02 | 1.18             | 0.605222 | 1.18                               |
| Akt3     | A07  | 9.65                                            | 9.65    | 1.2E-03           | 1.2E-03 | 1.00             | 0.917337 | -1.00                              |
| Araf     | A08  | 4.09                                            | 3.69    | 5.9E-02           | 7.7E-02 | 0.76             | N/A      | -1.31                              |
| Bcl2l1   | A09  | 5.98                                            | 5.40    | 1.6E-02           | 2.4E-02 | 0.67             | 0.168497 | -1.49                              |
| Braf     | A10  | 7.66                                            | 7.80    | 4.9E-03           | 4.5E-03 | 1.10             | 0.511738 | 1.10                               |
| Cap1     | A11  | 5.01                                            | 5.07    | 3.1E-02           | 3.0E-02 | 1.05             | 0.732696 | 1.05                               |
| Cbl      | A12  | 9.68                                            | 10.05   | 1.2E-03           | 9.4E-04 | 1.30             | 0.407195 | 1.30                               |
| Cebpa    | B01  | 3.67                                            | 6.27    | 7.9E-02           | 1.3E-02 | 6.08             | 0.950302 | 6.08                               |
| Cebpb    | B02  | 12.79                                           | 12.65   | 1.4E-04           | 1.6E-04 | 0.90             | N/A      | -1.11                              |
| Cfd      | B03  | 4.32                                            | 4.13    | 5.0E-02           | 5.7E-02 | 0.88             | 0.706524 | -1.14                              |
| Dok1     | B04  | 10.94                                           | 10.94   | 5.1E-04           | 5.1E-04 | 1.00             | 0.607590 | 1.00                               |
| Dok2     | B05  | 12.17                                           | 12.12   | 2.2E-04           | 2.2E-04 | 0.97             | 0.722672 | -1.03                              |
| Dok3     | B06  | 10.00                                           | 11.15   | 9.7E-04           | 4.4E-04 | 2.21             | 0.083272 | 2.21                               |
| Dusp14   | B07  | 9.72                                            | 9.60    | 1.2E-03           | 1.3E-03 | 0.92             | 0.577725 | -1.08                              |
| Eif2b1   | B08  | 7.00                                            | 7.31    | 7.8E-03           | 6.3E-03 | 1.24             | N/A      | 1.24                               |
| Eif4ebp1 | B09  | 4.97                                            | 4.98    | 3.2E-02           | 3.2E-02 | 1.00             | 0.966788 | 1.00                               |
| Ercc1    | B10  | 11.91                                           | 11.99   | 2.6E-04           | 2.5E-04 | 1.06             | 0.874044 | 1.06                               |
| Fasn     | B11  | 3.81                                            | 4.29    | 7.1E-02           | 5.1E-02 | 1.40             | N/A      | 1.40                               |
| Fbp1     | B12  | 1.80                                            | 1.47    | 2.9E-01           | 3.6E-01 | 0.80             | 0.502627 | -1.26                              |
| Fos      | C01  | 10.57                                           | 10.77   | 6.6E-04           | 5.7E-04 | 1.15             | 0.745289 | 1.15                               |
| Frs2     | C02  | 7.57                                            | 7.39    | 5.3E-03           | 5.9E-03 | 0.89             | 0.419211 | -1.13                              |
| Frs3     | C03  | 12.21                                           | 12.40   | 2.1E-04           | 1.8E-04 | 1.14             | 0.509824 | 1.14                               |
| G6pc     | C04  | 4.98                                            | 3.17    | 3.2E-02           | 1.1E-01 | 0.28             | 0.841671 | -3.53                              |
| Gab1     | C05  | 8.92                                            | 8.99    | 2.1E-03           | 2.0E-03 | 1.05             | 0.909824 | 1.05                               |
| Gcg      | C06  | 14.67                                           | N/A     | 3.8E-05           | N/A     | N/A              | N/A      | N/A                                |
| Gck      | C07  | 6.55                                            | 5.77    | 1.1E-02           | 1.8E-02 | 0.58             | N/A      | -1.72                              |
| Gpd1     | C08  | 3.87                                            | 3.46    | 6.8E-02           | 9.1E-02 | 0.75             | 0.553015 | -1.33                              |
| Grb10    | C09  | 12.21                                           | 12.34   | 2.1E-04           | 1.9E-04 | 1.09             | 0.605081 | 1.09                               |
| Grb2     | C10  | 3.71                                            | 3.83    | 7.6E-02           | 7.0E-02 | 1.09             | N/A      | 1.09                               |
| Gsk3b    | C11  | 6.79                                            | 6.93    | 9.1E-03           | 8.2E-03 | 1.11             | 0.726290 | 1.11                               |
| Hk2      | C12  | 12.22                                           | 12.62   | 2.1E-04           | 1.6E-04 | 1.33             | 0.380887 | 1.33                               |
| Hras     | D01  | 3.37                                            | 3.25    | 9.7E-02           | 1.1E-01 | 0.92             | 0.813262 | -1.09                              |
| Igf1r    | D02  | 11.65                                           | 11.63   | 3.1E-04           | 3.2E-04 | 0.98             | 0.863731 | -1.02                              |

| Symbol   | Well | AVG $\Delta C_t$ (Ct(GOI) - Ave Ct (HKG)) |         | $2^{-\Delta C_t}$ |         | Fold Change   | T-TEST          | Fold Up- or Down-Regulation |
|----------|------|-------------------------------------------|---------|-------------------|---------|---------------|-----------------|-----------------------------|
|          |      | P407                                      | CONTROL | P407              | CONTROL | P407 /CONTROL | p value         | P407 /CONTROL               |
| Igf2     | D03  | 12.16                                     | 12.28   | 2.2E-04           | 2.0E-04 | 1.09          | 0.576069        | 1.09                        |
| Igfbp1   | D04  | 2.69                                      | 2.49    | 1.5E-01           | 1.8E-01 | 0.87          | 0.931905        | -1.15                       |
| Ins1     | D05  | 11.76                                     | 13.16   | 2.9E-04           | 1.1E-04 | 2.63          | N/A             | 2.63                        |
| Ins2     | D06  | 12.79                                     | 13.16   | 1.4E-04           | 1.1E-04 | 1.29          | N/A             | 1.29                        |
| Insl3    | D07  | 11.97                                     | 12.65   | 2.5E-04           | 1.6E-04 | 1.60          | N/A             | 1.60                        |
| Insr     | D08  | 5.44                                      | 5.88    | 2.3E-02           | 1.7E-02 | 1.35          | 0.227271        | 1.35                        |
| Irs1     | D09  | 5.58                                      | 5.47    | 2.1E-02           | 2.3E-02 | 0.92          | 0.655403        | -1.09                       |
| Irs2     | D10  | 8.80                                      | 9.62    | 2.2E-03           | 1.3E-03 | 1.76          | <b>0.026492</b> | 1.76                        |
| Jun      | D11  | 6.91                                      | 7.43    | 8.3E-03           | 5.8E-03 | 1.44          | 0.441436        | 1.44                        |
| Klf10    | D12  | 7.66                                      | 7.78    | 4.9E-03           | 4.6E-03 | 1.08          | 0.663021        | 1.08                        |
| Kras     | E01  | 7.66                                      | 7.48    | 4.9E-03           | 5.6E-03 | 0.88          | 0.310540        | -1.13                       |
| Ldlr     | E02  | 5.63                                      | 6.27    | 2.0E-02           | 1.3E-02 | 1.55          | 0.278261        | 1.55                        |
| Lep      | E03  | 14.67                                     | N/A     | 3.8E-05           | N/A     | <b>N/A</b>    | N/A             | <b>N/A</b>                  |
| Map2k1   | E04  | 6.25                                      | 6.31    | 1.3E-02           | 1.3E-02 | 1.05          | 0.967957        | 1.05                        |
| Mapk1    | E05  | 3.93                                      | 3.98    | 6.6E-02           | 6.3E-02 | 1.03          | 0.755070        | 1.03                        |
| Mtor     | E06  | 7.07                                      | 7.00    | 7.5E-03           | 7.8E-03 | 0.95          | 0.748041        | -1.05                       |
| Nos2     | E07  | 13.20                                     | 12.65   | 1.1E-04           | 1.6E-04 | 0.68          | N/A             | -1.46                       |
| Npy      | E08  | 7.95                                      | 7.37    | 4.1E-03           | 6.0E-03 | 0.67          | 0.380978        | -1.49                       |
| Pck2     | E09  | 4.99                                      | 5.84    | 3.1E-02           | 1.8E-02 | 1.79          | 0.184082        | 1.79                        |
| Pdpk1    | E10  | 6.53                                      | 6.55    | 1.1E-02           | 1.1E-02 | 1.01          | N/A             | 1.01                        |
| Pik3ca   | E11  | 6.84                                      | 6.98    | 8.7E-03           | 7.9E-03 | 1.10          | 0.689183        | 1.10                        |
| Pik3cb   | E12  | 6.91                                      | 7.01    | 8.3E-03           | 7.8E-03 | 1.07          | 0.798322        | 1.07                        |
| Pik3r1   | F01  | 6.65                                      | 5.81    | 1.0E-02           | 1.8E-02 | 0.56          | 0.188509        | -1.79                       |
| Pik3r2   | F02  | 8.40                                      | 8.53    | 3.0E-03           | 2.7E-03 | 1.09          | 0.804854        | 1.09                        |
| Pklr     | F03  | 3.86                                      | 2.86    | 6.9E-02           | 1.4E-01 | 0.50          | 0.477493        | -2.00                       |
| Pparg    | F04  | 10.40                                     | 10.21   | 7.4E-04           | 8.5E-04 | 0.88          | 0.749064        | -1.14                       |
| Ppp1ca   | F05  | 3.57                                      | 3.67    | 8.4E-02           | 7.9E-02 | 1.07          | 0.633707        | 1.07                        |
| Prkcg    | F06  | 12.43                                     | 12.62   | 1.8E-04           | 1.6E-04 | 1.14          | 0.587596        | 1.14                        |
| Prkcz    | F07  | 8.73                                      | 8.95    | 2.4E-03           | 2.0E-03 | 1.16          | 0.775432        | 1.16                        |
| Prl      | F08  | 12.79                                     | 12.62   | 1.4E-04           | 1.6E-04 | 0.89          | 0.757958        | -1.13                       |
| Ptpn1    | F09  | 7.38                                      | 7.69    | 6.0E-03           | 4.8E-03 | 1.24          | 0.562210        | 1.24                        |
| Raf1     | F10  | 3.73                                      | 3.92    | 7.5E-02           | 6.6E-02 | 1.14          | 0.453272        | 1.14                        |
| Retn     | F11  | 14.67                                     | 13.16   | 3.8E-05           | 1.1E-04 | 0.35          | N/A             | -2.85                       |
| Rps6ka1  | F12  | 7.12                                      | 7.18    | 7.2E-03           | 6.9E-03 | 1.04          | 0.944111        | 1.04                        |
| Rras     | G01  | 5.37                                      | 5.85    | 2.4E-02           | 1.7E-02 | 1.39          | 0.235829        | 1.39                        |
| Rras2    | G02  | 5.35                                      | 6.16    | 2.4E-02           | 1.4E-02 | 1.75          | N/A             | 1.75                        |
| Serpine1 | G03  | 11.18                                     | 11.67   | 4.3E-04           | 3.1E-04 | 1.40          | 0.765379        | 1.40                        |
| Shc1     | G04  | 5.22                                      | 5.56    | 2.7E-02           | 2.1E-02 | 1.27          | 0.643608        | 1.27                        |

| Symbol  | Well | AVG $\Delta C_t$<br>(Ct(GOI) - Ave Ct<br>(HKG)) |         | $2^{-\Delta C_t}$ |         | Fold<br>Change   | T-TEST          | Fold Up-<br>or Down-<br>Regulation |
|---------|------|-------------------------------------------------|---------|-------------------|---------|------------------|-----------------|------------------------------------|
|         |      | P407                                            | CONTROL | P407              | CONTROL | P407<br>/CONTROL | p value         | P407<br>/CONTROL                   |
| Slc27a4 | G05  | 7.79                                            | 7.78    | 4.5E-03           | 4.6E-03 | 0.99             | 0.956394        | -1.01                              |
| Slc2a1  | G06  | 11.55                                           | 10.78   | 3.3E-04           | 5.7E-04 | 0.59             | 0.262772        | -1.70                              |
| Slc2a4  | G07  | 12.79                                           | 13.16   | 1.4E-04           | 1.1E-04 | 1.29             | N/A             | 1.29                               |
| Sos1    | G08  | 6.78                                            | 6.66    | 9.1E-03           | 9.9E-03 | 0.92             | 0.898960        | -1.09                              |
| Srebf1  | G09  | 9.09                                            | 9.58    | 1.8E-03           | 1.3E-03 | 1.41             | N/A             | 1.41                               |
| Tg      | G10  | 11.90                                           | 10.99   | 2.6E-04           | 4.9E-04 | 0.53             | <b>0.010198</b> | -1.88                              |
| Ucp1    | G11  | 13.22                                           | 12.14   | 1.1E-04           | 2.2E-04 | 0.47             | N/A             | -2.11                              |
| Vegfa   | G12  | 4.95                                            | 4.90    | 3.2E-02           | 3.4E-02 | 0.96             | 0.857308        | -1.04                              |
| Actb    | H01  | 0.68                                            | 0.92    | 6.3E-01           | 5.3E-01 | 1.19             | 0.551329        | 1.19                               |
| B2m     | H02  | -2.55                                           | -2.89   | 5.8E+00           | 7.4E+00 | 0.79             | 0.059386        | -1.27                              |
| Hprt1   | H03  | 1.68                                            | 0.98    | 3.1E-01           | 5.1E-01 | 0.62             | 0.239562        | -1.63                              |
| Ldha    | H04  | 0.34                                            | 0.88    | 7.9E-01           | 5.4E-01 | 1.46             | 0.108750        | 1.46                               |
| Rplp1   | H05  | -0.15                                           | 0.10    | 1.1E+00           | 9.3E-01 | 1.19             | 0.175467        | 1.19                               |



**S5 Increased blood levels of cholesterol and triglycerides following P407 treatment**

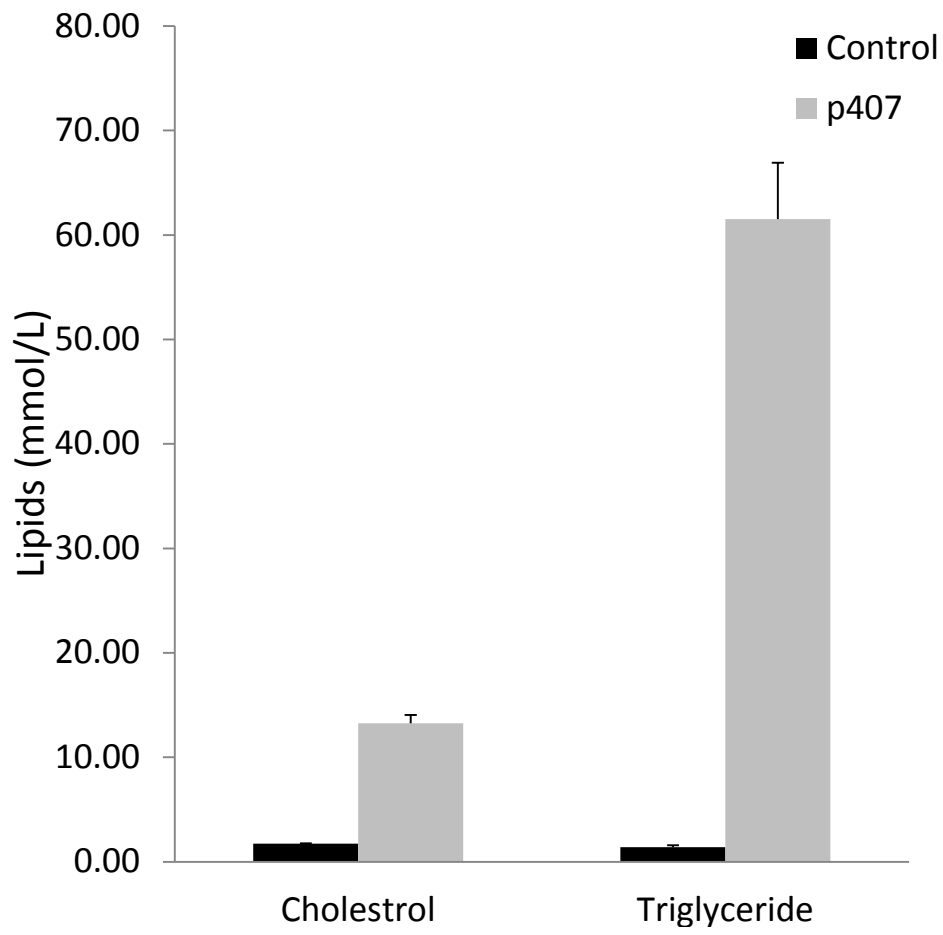

Supplement: ACEL-15-706-s001.pdf [file ACEL-15-706-s001.pdf]
